# Supplementary material for: The ESCRT protein Chmp4c regulates mitotic spindle checkpoint signaling
Source: PubMed Central journal article supplement — J Cell Biol. 2018 Mar 5;217(3):861–76. doi: 10.1083/jcb.201709005 (PMC5839794; doi:10.1083/jcb.201709005), 2018-03-05
Supplement: JCB_201709005_sm.pdf [file JCB_201709005_sm.pdf]

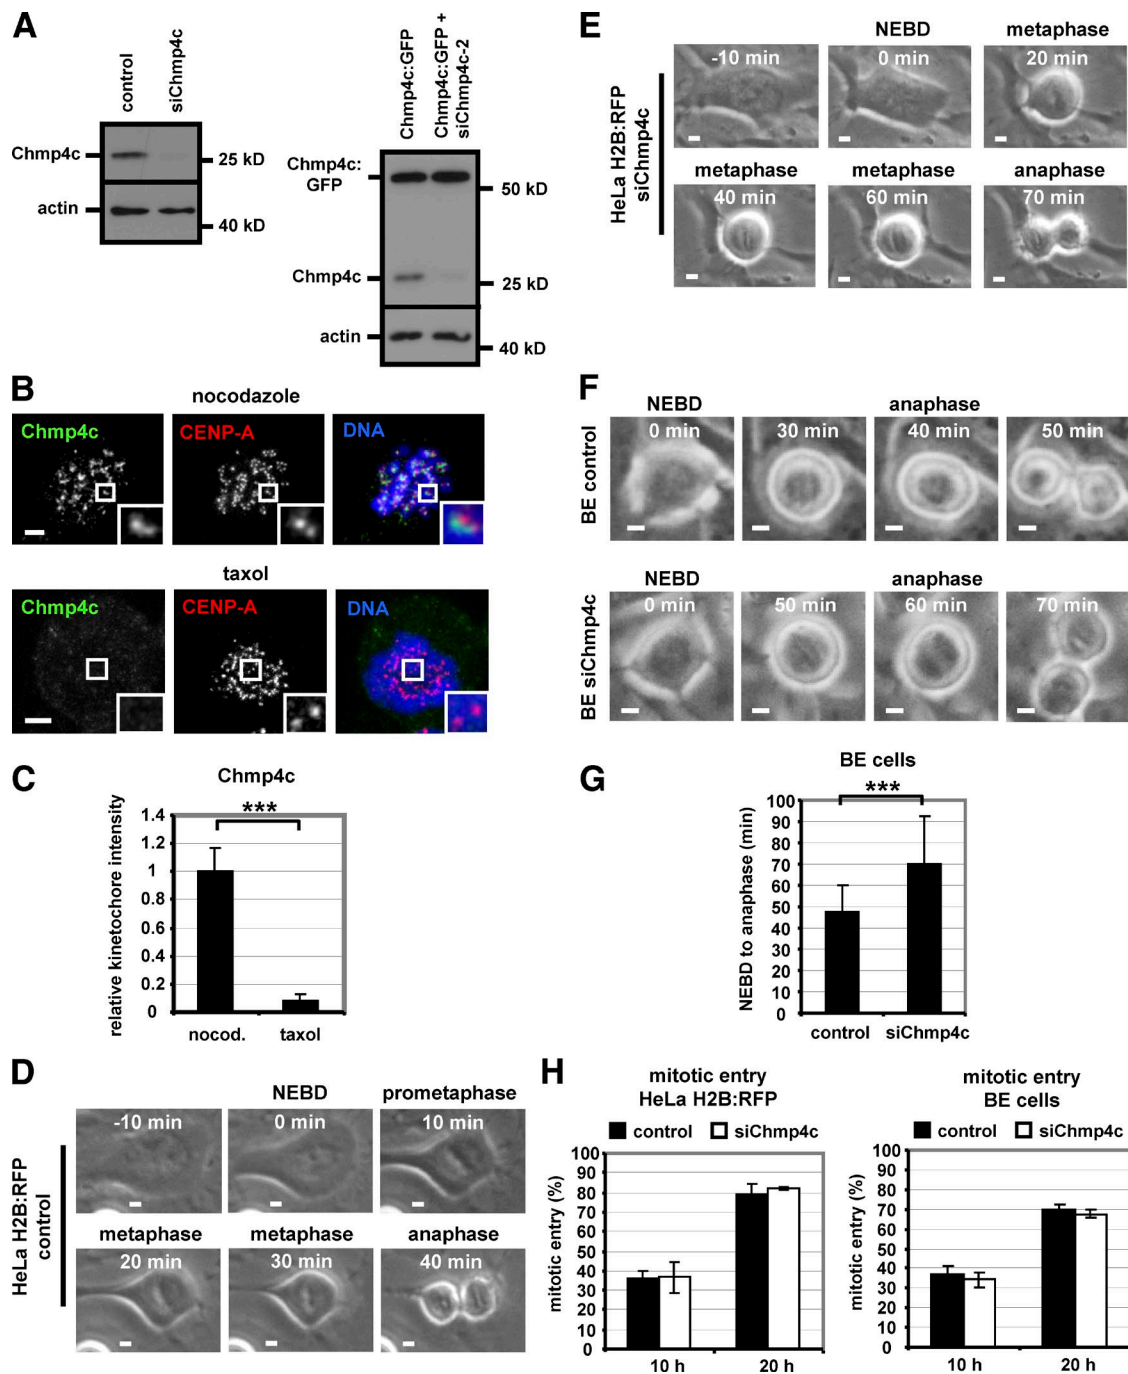

Figure S1. **Chmp4c-depletion delays anaphase onset.** (A) Western blot analysis of total Chmp4c or actin in cells transfected with negative siRNA (control), two different Chmp4c siRNAs (siChmp4c, siChmp4c-2), or Chmp4c:GFP. (B and C) Chmp4c localization in cells treated with nocodazole (nocod) or taxol for 4 h. Relative green/red fluorescence intensity is shown, and values in nocodazole were set to one.  $n > 200$  kinetochores, 20 cells from three independent experiments. Insets in B show 1.7 $\times$  magnification of kinetochores. (D–F) Phase-contrast images of HeLa H2B:RFP (D and E) or BE cells (F) transfected as in A and monitored by time-lapse microscopy. Time is from NEBD. Related to Videos 3–6. Bars, 5  $\mu$ m. (G) Time from NEBD to anaphase, calculated from time-lapse movies as in F. Control:  $n = 52$ ; siChmp4c:  $n = 53$ . Error bars show the SD. \*\*\* $P < 0.001$  compared with the control. Student's  $t$  test was used. (H) Percentage of cells entering mitosis calculated from time-lapse movies as in D–F. Time is from the start of filming. HeLa H2B:RFP–control:  $n = 264$  and siChmp4c:  $n = 272$ ; BE cells–control  $n = 292$  and siChmp4c:  $n = 335$ , from two independent experiments.

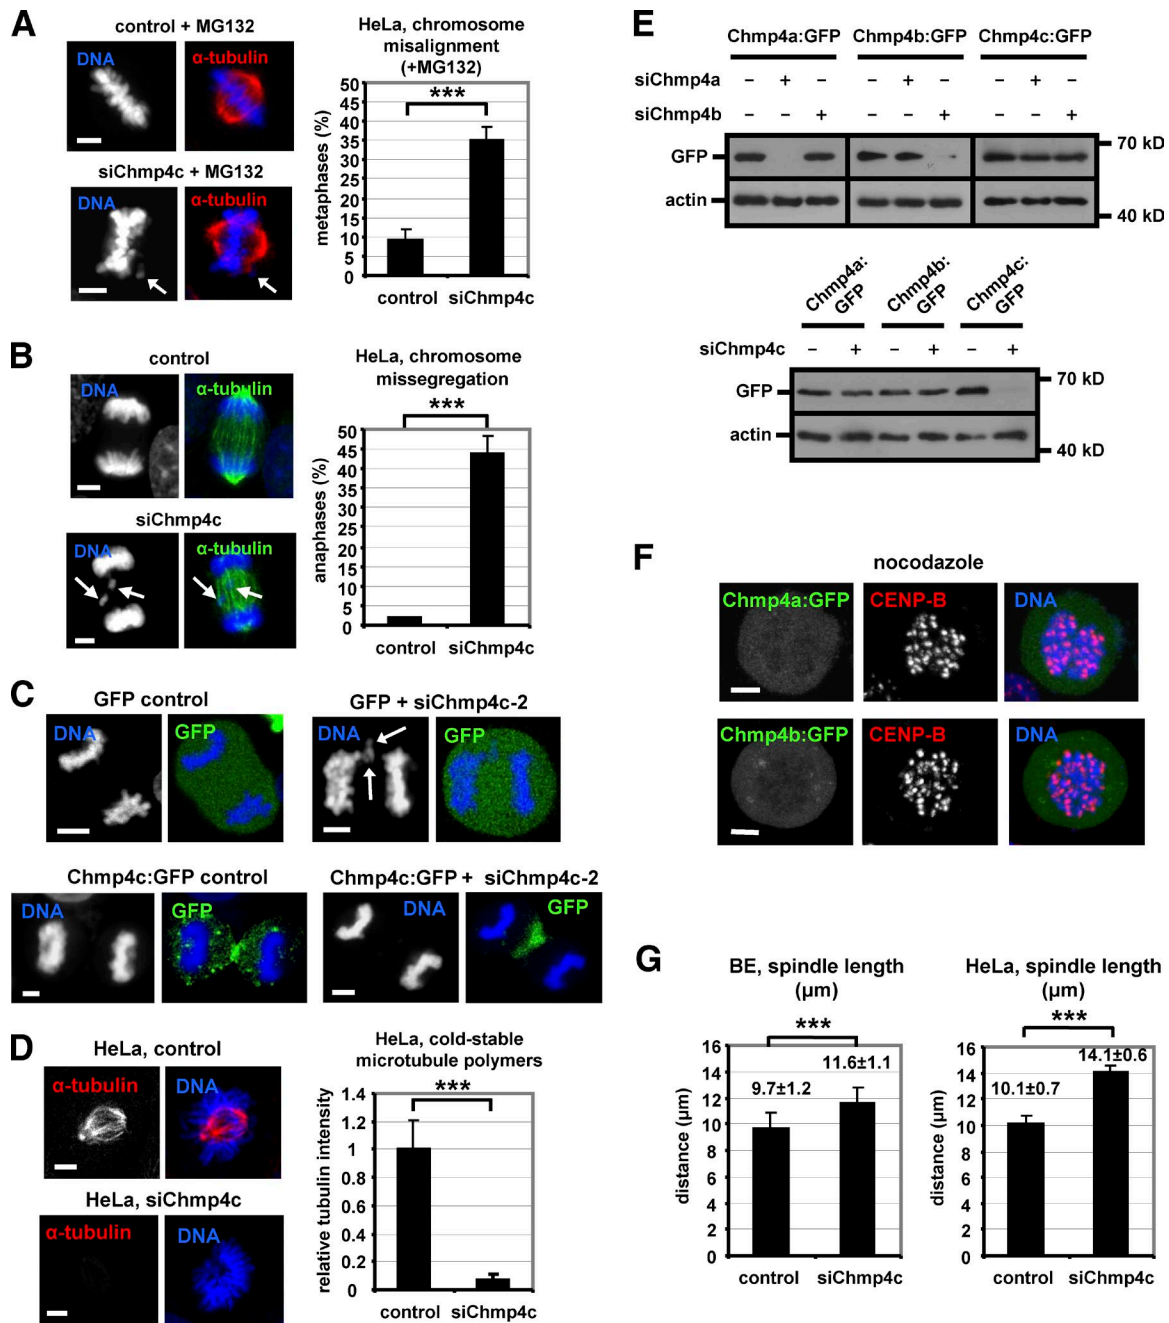

Figure S2. **Chmp4a and Chmp4b do not localize to kinetochores.** (A and B) Chromosome misalignment (A) or missegregation (B) in HeLa cells transfected with negative siRNA (control) or Chmp4c siRNA (siChmp4c) in the presence of MG132 for 1 h (A) or without MG132 (B).  $n = 300$  cells from three independent experiments. (C) Cells expressing GFP or Chmp4c:GFP resistant to degradation by siChmp4c-2 were transfected with negative siRNA (control) or Chmp4c-2 siRNA (siChmp4c-2). Arrows indicate misaligned or missegregated chromosomes. (D) Cold-stable microtubule fibers in cells transfected as in A and treated with ice-cold medium for 15 min.  $n = 90$  cells from three independent experiments. (E) Chmp4a, Chmp4b, and Chmp4c siRNAs do not cross-react with the other Chmp4 isoforms. Western blot analysis of total GFP and actin in cells transfected with Chmp4a:GFP, Chmp4b:GFP, or Chmp4c:GFP in the absence or presence of siChmp4a, siChmp4b, or siChmp4c. (F) Localization of Chmp4a:GFP and Chmp4b:GFP in cells transfected as in A and treated with nocodazole for 4 h. Bars, 5  $\mu\text{m}$ . (G) Metaphase-like spindle length in cells transfected as in A. Average values  $\pm$  SD are shown.  $n = 30$  cells from three independent experiments. Error bars show the SD. \*\*\*,  $P < 0.001$  compared with control. Student's  $t$  test was used.

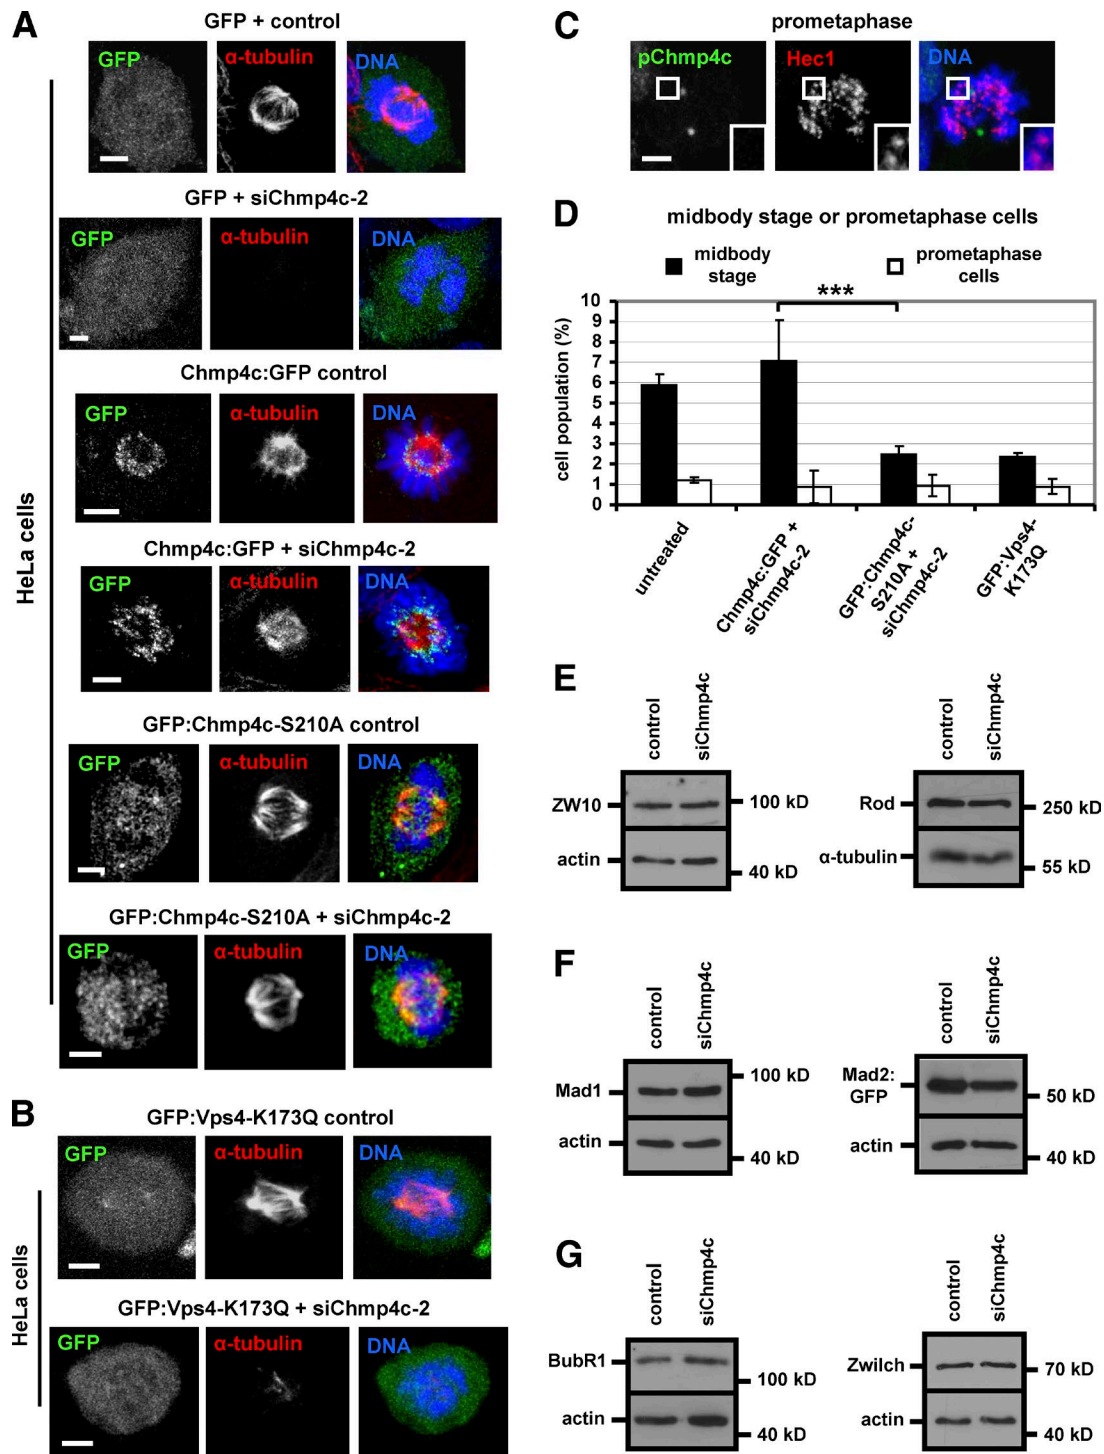

Figure S3. **Expression of Chmp4c-S210A or Vps4-K173Q mutant proteins reduces the frequency of midbody-stage cells.** (A and B) Cold-stable microtubule polymers. Cells expressing GFP, GFP:Chmp4c-S210A resistant to degradation by Chmp4c-2 siRNA (siChmp4c-2), or GFP:Vps4-K173Q were transfected with negative siRNA (control) or siChmp4c-2 and treated with ice-cold medium for 15 min. (C) Phosphorylated Chmp4c-S210, S214, and S215 (pChmp4c) were not detectable at kinetochores in prometaphase. 20 cells from two independent experiments were examined. Insets in C show 1.7 $\times$  magnification of kinetochores. Bars, 5  $\mu$ m. (D) Frequency of prometaphase or midbody stage cells. Cells were untreated or transfected as in A and B. Error bars show the SD from the mean from three independent experiments. A minimum of 300 cells was analyzed per experiment. \*\*\*,  $P < 0.001$  compared with the control. Statistical significant differences were determined by ANOVA and Student's  $t$  test. (E-G) Western blot analysis of total ZW10, Rod, Mad1, Mad2:GFP, BubR1, Zwilch, or actin.

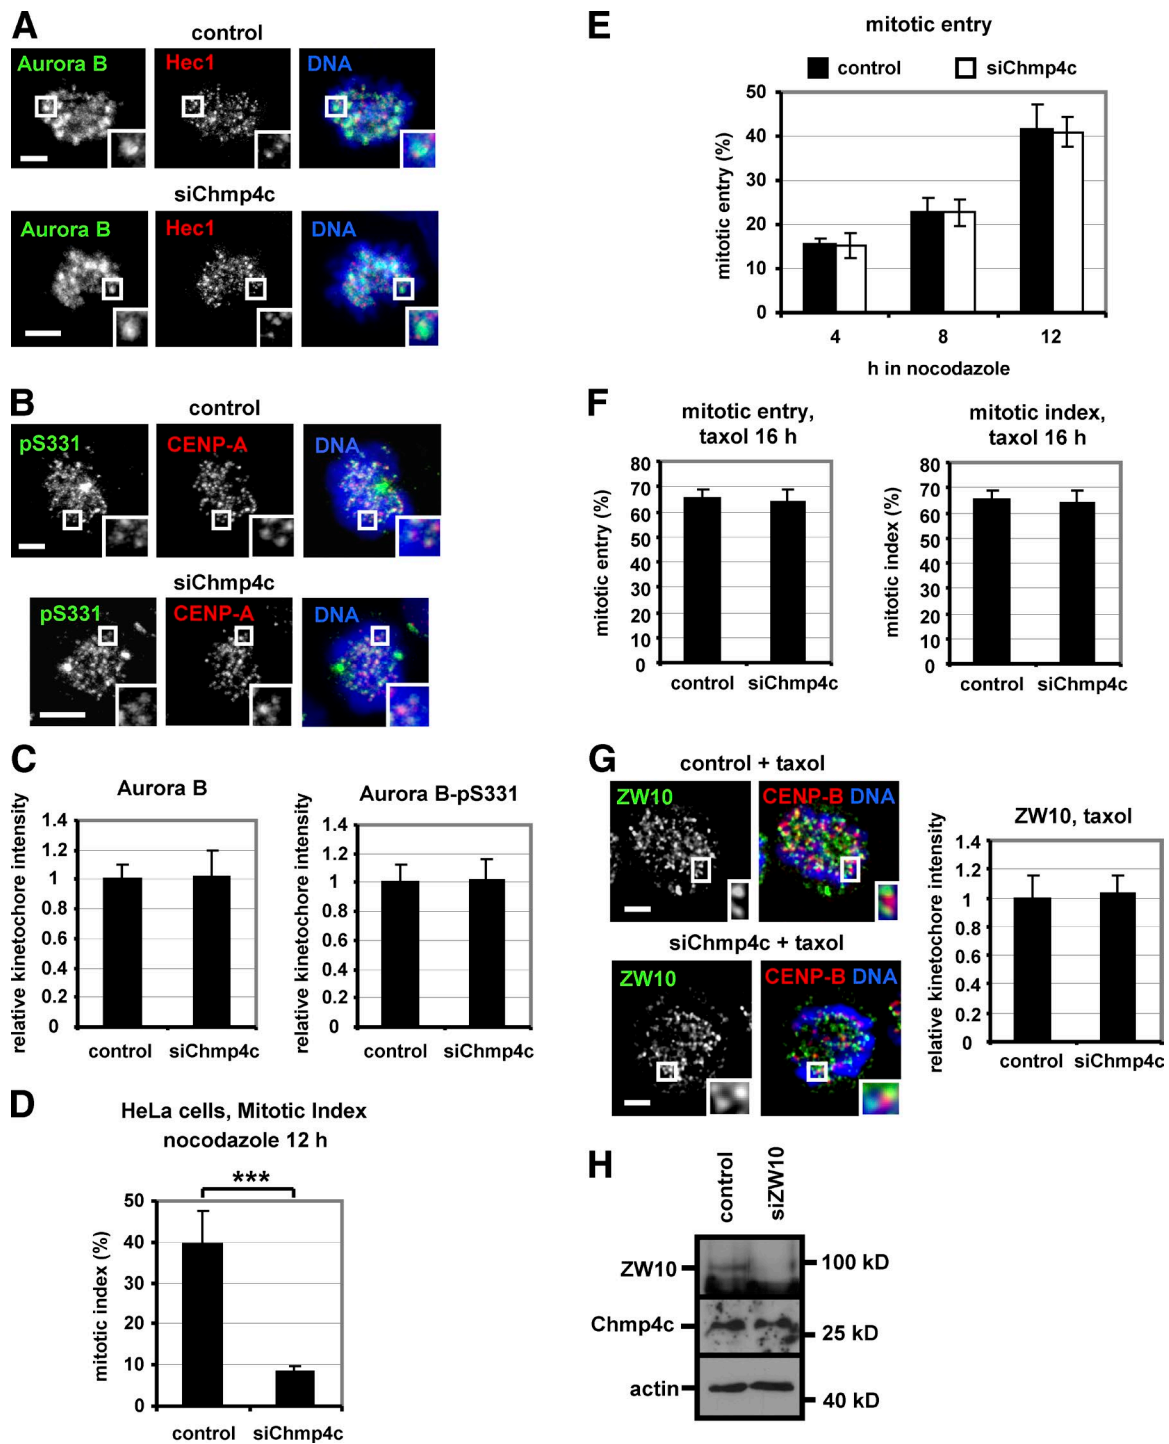

Figure S4. **Chmp4c is not required for taxol-induced mitotic arrest.** (A–C) Localization of total Aurora B or phosphorylated Aurora B-S331 (pS331) in cells transfected with negative siRNA (control) or Chmp4c siRNA (siChmp4c). (D) Mitotic index analysis of HeLa cells transfected as in A and treated with nocodazole.  $n = 300$  from three independent experiments. \*\*\*,  $P < 0.001$  compared with the control. Student's  $t$  test was used. (E) Percentage of BE cells entering mitosis in nocodazole as determined by phase-contrast time-lapse microscopy. Control:  $n = 367$ ; siChmp4c:  $n = 413$ . (F) Mitotic entry and mitotic index analysis of BE cells treated with taxol, determined by phase-contrast time-lapse microscopy. Control:  $n = 301$ ; siChmp4c:  $n = 374$  from two independent experiments. Error bars show the SD. (G) Localization of ZW10. Cells were transfected as in A and treated with taxol for 4 h. Relative green/red fluorescence intensity is shown, and values in control were set to one.  $n > 200$  kinetochores, 20 cells (C and G) from three independent experiments. Insets show 1.7 $\times$  magnification of kinetochores. Bars, 5  $\mu\text{m}$ . (H) Western blot analysis of total ZW10, Chmp4c, and actin in cells transfected with negative siRNA (control) or ZW10 siRNA (siZW10).



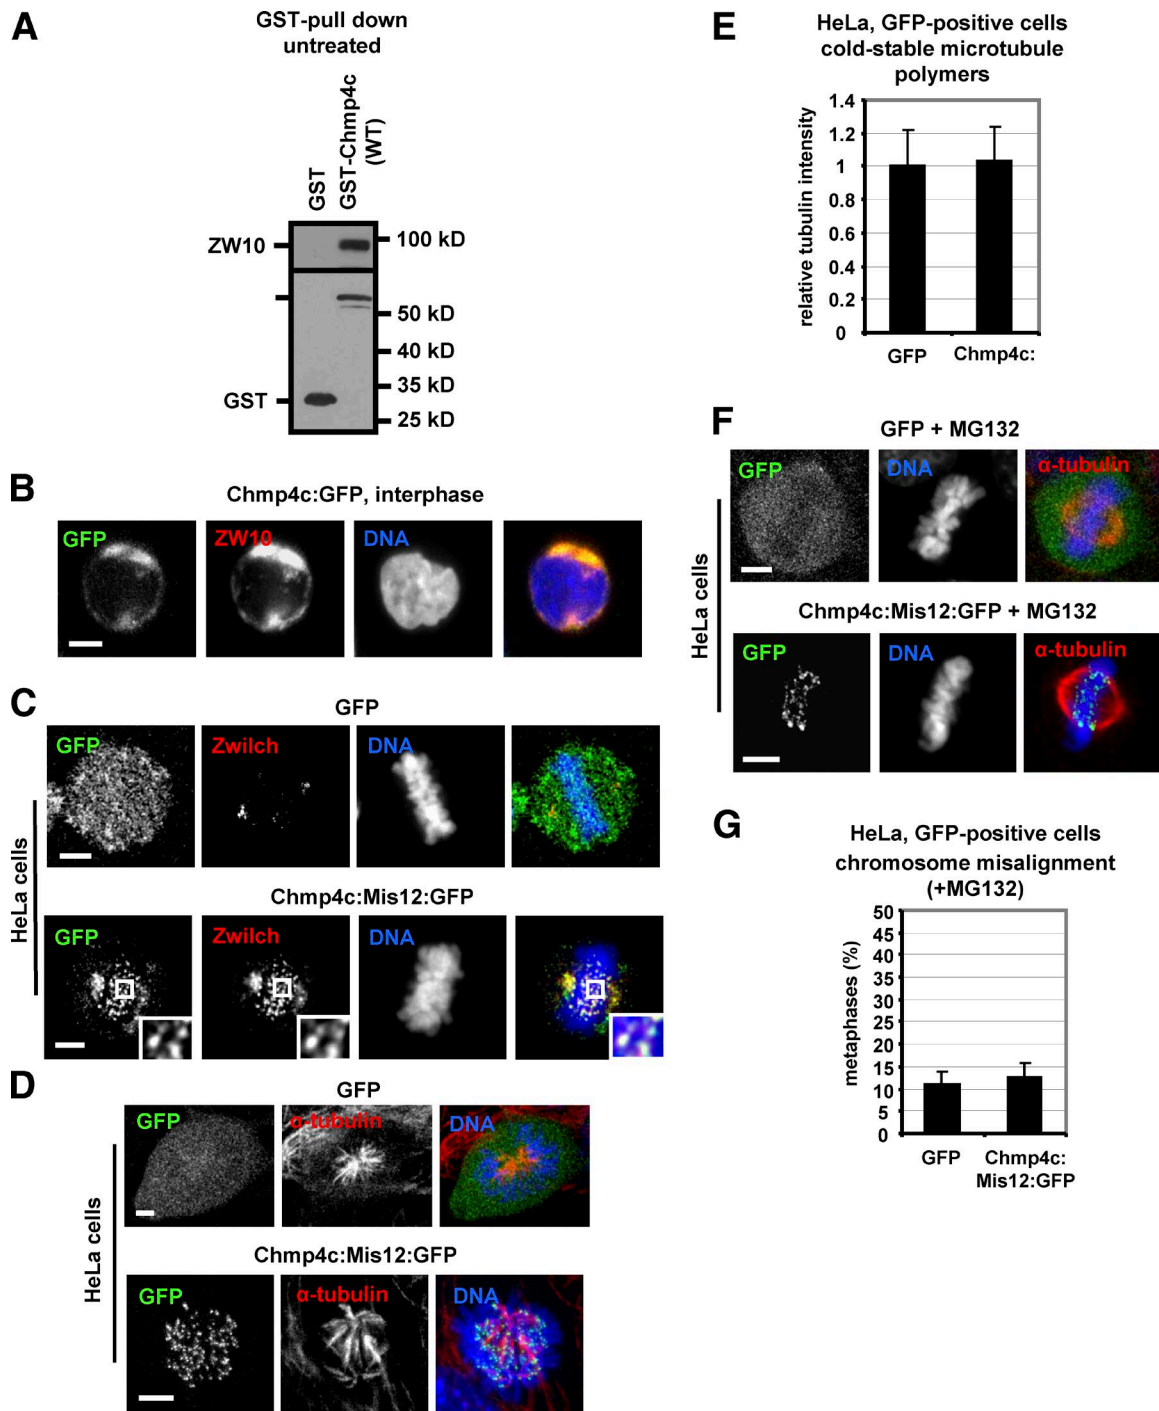

Figure S5. **Expression of Chmp4c: Mis12:GFP promotes localization of Zwilch to metaphase kinetochores.** (A) GST pull-down assay from untreated cells. Precipitated ZW10 or GST was detected by Western blotting. (B) Localization of Chmp4c:GFP and ZW10 in an interphase cell. 20 GFP-positive cells from two independent experiments were analyzed. (C) Localization of Zwilch in the metaphase plate in cells expressing GFP or Chmp4c: Mis12:GFP. Insets in C show 1.7 $\times$  magnification of kinetochores. (D and E) Cold-stable microtubule polymers. Cells transfected as in C were treated with ice-cold medium for 15 min. Mean tubulin intensity is shown, and values in GFP were set to one. (F and G) Chromosome misalignment. Cells transfected as in C were treated with MG132 for 1 h.  $n = 90$  cells from three independent experiments. Error bars show the SD. Bars, 5  $\mu$ m.

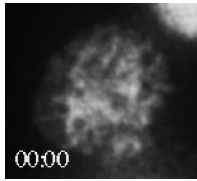

Video 1. **Control cells exhibit successful chromatin alignment and segregation.** HeLa cells stably expressing H2B:RFP (white) were transfected with negative siRNA and analyzed by fluorescence time-lapse microscopy. Time = 0, start of chromatin condensation. Frames were taken every 2.5 min for 37.5 min. Time counter shows minute:second. Display rate: one frame per second. Related image stills are shown in Fig. 2 A.

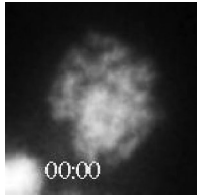

Video 2. **Chmp4c-deficient cells enter anaphase with misaligned chromatin.** HeLa cells stably expressing H2B:RFP (white) were transfected with Chmp4c siRNA and analyzed by fluorescence time-lapse microscopy. Time = 0, start of chromatin condensation. Frames were taken every 2.5 min for 65 min. Time counter shows minute:second. Display rate: one frame per second. Related image stills are shown in Fig. 2 B.

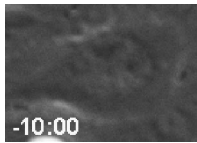

Video 3. **Progression from NEBD to anaphase in control HeLa H2B:RFP cells.** HeLa cells stably expressing H2B:RFP were transfected with negative siRNA and analyzed by phase-contrast time-lapse microscopy. Time = 0, NEBD. Frames were taken every 10 min for 60 min. Time counter shows minute:second. Display rate: one frame per second. Related image stills are shown in Fig. S1 D.

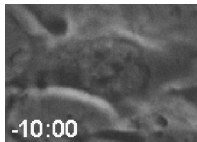

Video 4. **Progression from NEBD to anaphase in Chmp4c-depleted HeLa H2B:RFP cells.** HeLa cells stably expressing H2B:RFP were transfected with Chmp4c siRNA and analyzed by phase-contrast time-lapse microscopy. Time = 0, NEBD. Frames were taken every 10 min for 90 min. Time counter shows minute:second. Display rate: one frame per second. Related image stills are shown in Fig. S1 E.

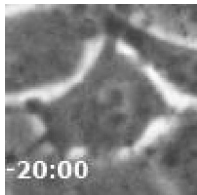

Video 5. **Progression from NEBD to anaphase in control BE cells.** BE cells transfected with negative siRNA were analyzed by phase-contrast time-lapse microscopy. Time = 0, NEBD. Frames were taken every 10 min for 80 min. Time counter shows minute:second. Display rate: one frame per second. Related image stills are shown in Fig. S1 F.

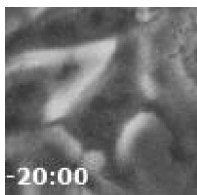

Video 6. **Progression from NEBD to anaphase in Chmp4c-depleted BE cells.** BE cells transfected with Chmp4c siRNA were analyzed by phase-contrast time-lapse microscopy. Time = 0, NEBD. Frames were taken every 10 min for 100 min. Time counter shows minute:second. Display rate: one frame per second. Related image stills are shown in Fig. S1 F.

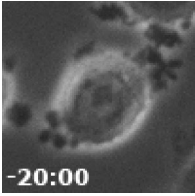

Video 7. **Control cells treated with nocodazole arrest in mitosis with condensed chromatin.** BE cells transfected with negative siRNA were treated with 3.32  $\mu$ M nocodazole and analyzed by phase-contrast time-lapse microscopy. Time = 0, NEBD. Frames were taken every 20 min for 800 min. Time counter shows minute:second. Display rate: one frame per second. Related image stills are shown in Fig. 5 B.

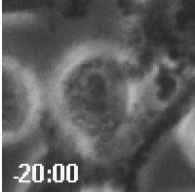

Video 8. **Chmp4c-deficient cells treated with nocodazole enter mitosis but decondense their chromatin and become multinucleated.** BE cells transfected with Chmp4c siRNA were treated with 3.32  $\mu$ M nocodazole and analyzed by phase-contrast time-lapse microscopy. Time = 0, NEBD. Frames were taken every 10 min for 190 min. Time counter shows minute:second. Display rate: one frame per second. Related image stills are shown in Fig. 5 B.
